# Supplementary material
Source: PubMed Central journal article supplement (PMC3811903)
Supplement: MCB.00856-13_zmb999100167so1.pdf [file MCB.00856-13_zmb999100167so1.pdf]

**Table S1.** Information about the glaucomatous eye donors

| <b>Patient No.</b>                | <b>GL62L</b>                               | <b>GL70LM</b>                                                                                                                      | <b>GL113L</b>                                                                                      | <b>GL118R</b>                                   |
|-----------------------------------|--------------------------------------------|------------------------------------------------------------------------------------------------------------------------------------|----------------------------------------------------------------------------------------------------|-------------------------------------------------|
| <b>Age</b>                        | 57                                         | 90                                                                                                                                 | 70                                                                                                 | 87                                              |
| <b>Gender/Race</b>                | M/C                                        | M/C                                                                                                                                | M/C                                                                                                | F/C                                             |
| <b>Cause of Death</b>             | Acute cardiac events;<br>Esophageal cancer | Pneumonia                                                                                                                          | Metastatic lung cancer                                                                             | Myocardial infarction                           |
| <b>Known eye problems</b>         | Glaucoma                                   | Chronic narrow angle glaucoma                                                                                                      | Glaucoma;<br>Detached retina                                                                       | Chronic open angle glaucoma;<br>Cataract        |
| <b>Ocular medications</b>         | None                                       | Pilocarpine and Timoptic (18 yr);<br><br>Trusopt and Iopidine (39 d);<br><br>Betoptics and Iopidine(11 d);<br><br>Cataract surgery | None                                                                                               | Intraocular lens implant;<br><br>Timoptic 0.05% |
| <b>Other medications</b>          | Chemotherapy                               | Not recorded                                                                                                                       | Morphine;<br>Acetaminophen;<br>Milk of magnesia;<br>Docusate Sodium;<br>Bisacodyl;<br>Promethazine | None                                            |
| <b>Intraocular Pressure (IOP)</b> | Not recorded                               | 21 mmHg (OD);<br>22 mmHg (OS)                                                                                                      | Not recorded                                                                                       | 22 mmHg (OD);<br>26 mmHg (OS)                   |
| <b>IOP duration</b>               | Not recorded                               | 18 yr                                                                                                                              | Not recorded                                                                                       | Not recorded                                    |
| <b>Expiration to Enucleation</b>  | 4 h                                        | 2 h                                                                                                                                | 2 h                                                                                                | 10 h                                            |
| <b>Fixative</b>                   | 10% formalin                               | 10% formalin                                                                                                                       | 10% formalin                                                                                       | 10% formalin                                    |

M: male; F: female; C: Caucasian; Yr: year; d: day; h: hour.
